# Supplementary material for: Loss of cortical control over the descending pain modulatory system determines the development of the neuropathic pain state in rats
Source: eLife. 2021 Feb 8;10:e65156. doi: 10.7554/eLife.65156 (PMC7895525; doi:10.7554/eLife.65156)
Supplement: Figure 2—source data 1. [file elife-65156-fig2-data1.xlsx]

## Sheet: Sheet1
	Figure 2 PrL-P neurons bidirectionally regulate nociception in naive rats.
	Figure 2B - Effect of optoactivation on withdrawal thresholds from the hind-paw ipsilateral to transfected pathway										Figure 2B - Effect of optoactivation on withdrawal thresholds from the hind-paw contralateral to transfected pathway
	NaivePrL.ChR2:hM4Di					NaivePrL.Control					NaivePrL.ChR2:hM4Di					NaivePrL.Control
	No Stimulation	Optoactivation				No Stimulation	Optoactivation				No Stimulation	Optoactivation				No Stimulation	Optoactivation
	8.9	11.5				10.95	10.2				9.25	10.75				11.4	11.5
	5.8	7.5				9.1	10.8				7.35	9.15				13.1	7.3
	6.2	15.1				13.3	11.2				10	8				11.2	11.2
	6	7.7				8.7	12.5				7.25	7.05				8.4	8.7
	9.2	13.5				6.7	12.9				10.3	6.8				6.2	10.2
	7.9	7.6				10.35	9.2				9.2	8.3				9.4	10.3
	8.4	10.7				10.5	8.2				8.9	11.6				10.05	11.6
	7.1	6.8									9.6	9.2
	7.1	12									8.7	12.1
	8.8	11.8									6.5	10.9
Mean	7.54	10.42				9.94	10.71				8.7	9.38				9.96	10.11
SEM	0.4	0.91				0.78	0.64				0.4	0.59				0.85	0.6
	Paired t test	t(9)=3.37	p=0.0083	n=10		t(6)=0.63	p=0.5526	n=7			t(9)=0.8595	p=0.4124	n=10			t(6)=0.1338	p=0.8979	n=6
	Figure 2D - Effect of chemoinhibtion on withdrawal thresholds from the hind-paw ipsilateral to transfected pathway										Figure 2E - Effect of chemoinhibtion on withdrawal thresholds from the contralateral ipsilateral to transfected pathway
	NaivePrL.ChR2:hM4Di					NaivePrL.Control					NaivePrL.ChR2:hM4Di					NaivePrL.Control
	Baseline	Chemoinhibtion				No Stimulation	Optoactivation				No Stimulation	Optoactivation				No Stimulation	Optoactivation
	9.4	9				10.95	10.2				12.7	6.7				11.5	12.7
	10.1	8.6				9.1	10.8				12.1	11				7.3	13.3
	12	9.2				13.3	11.2				7.7	10.01				11.2	8.4
	13	5.4				8.7	12.5				11	12.2				8.7	11
	7.2	3.9				6.7	12.9				9	8				10.2	10.4
	12.9	11.6				10.35	9.2				10.5	8.4				10.3	7.9
	8.5	4.6				10.5	8.2				8.3	7.7				11.6	10.6
	12.7	8.4									9.9	7.9
	8.1	8.5									7.5	9
	9.6	9.9									9.7	6.6
	9.8	6.6									9.6	9.9
	8.8	10.4									11	10.9
	13.8	12									8.1	9.7
	10.8	9.7									8.5	7.9
	7.3	7									7.1	6.8
Mean	10.27	8.32				9.94	10.71				9.51	8.85				10.11	10.61
SEM	0.56	0.62				0.78	0.64				0.44	0.44				0.6	0.76
											t(14)=1.225	p=0.2408	n=15			t(6)=0.43	p=0.6791	n=7
	Paired t-test	t(14)=3.26	p=0.0057	n=15		t(6)=0.63	p=0.5526
