# Supplementary material for: Loss of cortical control over the descending pain modulatory system determines the development of the neuropathic pain state in rats
Source: eLife. 2021 Feb 8;10:e65156. doi: 10.7554/eLife.65156 (PMC7895525; doi:10.7554/eLife.65156)
Supplement: Figure 3—figure supplement 1—source data 1. [file elife-65156-fig3-figsupp1-data1.xlsx]

## Sheet: Sheet1
Supplementary figure 2. Chemo-inhibition of PrL-P neurons affects nocicfensive behaviour in early but not late timepoints post injury in neuropathic animals.
Supplementary 2A. Efect of chemoinhibtion on mechanical withdrawal thresholds of the ipsilateral (injured) hind-paw in TNTPrL.ChR2:hM4Di rats.
Day	pre-CNO
0	0.6	0.33	0	0	0	0	0	0	0	0	0	0	0	0	0	0
3	0	0.7	5.3	0	4	1.3	6	0.33	3.7	4.7	3.6	3	5	1.5	2	3.3
7	6.7	3.3	7	13.9	7.3	1.7	9.7	2	11.3	7	4.7	8.3	2.3	5	4	6.3
14	4.7	11.7	5.3	4.6	5.7	1.7	9.7	5.3	18	5	10	11.7	9.7	3.7	3.3	11.7
21	5.4	5.7	7	6.3	8	5.3									2	9
35							6.3	2.5	12	5.7	9.7	8.3	5.7	4.3
42							10	4	7.7	6.3		9.3	4.7	6.3
Day	post-CNO
0	NA	NA	NA	NA	NA	NA	NA	NA	NA	NA	NA	NA	NA	NA	NA	NA
3	2.7	5	7.6	8	4	5.3	9		7.7	10	6	7	8.3	2.5	5.5	4.7
7	5.7	9.3	10.7	8	8	6.33	11.3	7	16	8.3	10	15.7	6.7	8.6	2.3	12
14	7.6	18	8.7	14	3.7	4.7	7.3	9.7	13.7	7	16.7	10.7	12.7	9.7	3	11
21	11	11.7	5	7.2	8	6.7									4	7.2
35							7	4.5	14	6	10.7	11.5	9.7	6.7
42							12	5	11	6		5.7		6.3
Mixed-effects model (REML)	F (DFn, DFd)	P value
Fixed effects (type III)
CNO	F (1, 28) = 7.263	<0.05
Time x CNO	F (5, 95) = 4.925	<0.001
Sidak's multiple comparisons test	Mean Diff.	95.00% CI of diff.	Adjusted P Value
3	4.416	0.4706 to 8.361	0.0233
7	2.589	0.04659 to 5.131	0.0447
14	0.7213	-0.2739 to 1.717	0.2457
21	-0.5343	-1.341 to 0.2728	0.275
35	0.7688	-1.241 to 2.778	0.8034
42	0.7388	-1.853 to 3.331	0.9483
Supplementary 2A. Efect of chemoinhibtion on cold evoked pain-like behaviour from the ipsilateral (injured) hind-paw in TNTPrL.ChR2:hM4Di rats.
Day	pre-CNO
0	0.6	0.33	0	0	0	0	0	0	0	0	0	0	0	0	0	0
3	0	0.7	5.3	0	4	1.3	6	0.33	3.7	4.7	3.6	3	5	1.5	2	3.3
7	6.7	3.3	7	13.9	7.3	1.7	9.7	2	11.3	7	4.7	8.3	2.3	5	4	6.3
14	4.7	11.7	5.3	4.6	5.7	1.7	9.7	5.3	18	5	10	11.7	9.7	3.7	3.3	11.7
21	5.4	5.7	7	6.3	8	5.3									2	9
35							6.3	2.5	12	5.7	9.7	8.3	5.7	4.3
42							10	4	7.7	6.3		9.3	4.7	6.3
Day	post-CNO
0	NA	NA	NA	NA	NA	NA	NA	NA	NA	NA	NA	NA	NA	NA	NA	NA
3	2.7	5	7.6	8	4	5.3	9		7.7	10	6	7	8.3	2.5	5.5	4.7
7	5.7	9.3	10.7	8	8	6.33	11.3	7	16	8.3	10	15.7	6.7	8.6	2.3	12
14	7.6	18	8.7	14	3.7	4.7	7.3	9.7	13.7	7	16.7	10.7	12.7	9.7	3	11
21	11	11.7	5	7.2	8	6.7									4	7.2
35							7	4.5	14	6	10.7	11.5	9.7	6.7
42							12	5	11	6		5.7		6.3
Mixed-effects model (REML)	F (DFn, DFd)	P value
Fixed effects (type III)
CNO	F (1, 30) = 6.328	0.0175
Time x CNO	F (5, 98) = 0.6047	0.6964
Sidak's multiple comparisons test	Mean Diff.	95.00% CI of diff.	Adjusted P Value
3	-3.443	-5.601 to -1.285	0.0006
7	-2.839	-6.295 to 0.6166	0.1552
14	-2.275	-6.607 to 2.057	0.6217
21	-1.513	-5.206 to 2.181	0.7889
35	-1.95	-6.750 to 2.850	0.7986
42	-0.7667	-5.753 to 4.220	0.997
