# Supplementary material for: Loss of cortical control over the descending pain modulatory system determines the development of the neuropathic pain state in rats
Source: eLife. 2021 Feb 8;10:e65156. doi: 10.7554/eLife.65156 (PMC7895525; doi:10.7554/eLife.65156)
Supplement: Figure 3—figure supplement 2—source data 1. [file elife-65156-fig3-figsupp2-data1.xlsx]

## Sheet: Sheet1
Supplementary figure 3. Delivery of vehicle does not affect sensitisation in TNTPrL.ChR2:hM4Di rats at 7 days
Supplementary Figure 3A - Effect of vehicle on mechanical sensitivity of the ipsilateral hind-paw in TNTPrL.ChR2:hM4Di rats
	pre-vehicle	post-vehicle
	2.72	3.09
	15	15
	6.88	15
mean	8.2	11.03
SEM	3.606	3.97
Paired t-test	t(2)=1.069	p=0.3970	n=3
Supplementary Figure 3A - Effect of vehicle on cold sensitivity of the ipsilateral hindpaw in TNTPrL.ChR2:hM4Di rats
	pre-vehicle	post-vehicle
	5.3	6
	0.3	0.3
	2.3	1.3
mean	2.6	2.5
SEM	1.452	1.757
Paired t-test	t(2)=0.2027	p=0.8581	n=3
