# Supplementary material for: Loss of cortical control over the descending pain modulatory system determines the development of the neuropathic pain state in rats
Source: eLife. 2021 Feb 8;10:e65156. doi: 10.7554/eLife.65156 (PMC7895525; doi:10.7554/eLife.65156)
Supplement: Figure 3—source data 1. [file elife-65156-fig3-data1.xlsx]

## Sheet: Sheet1
Figure 3 - Inhibtion of Prl-P neurons unmasks hypersensitivity in neuropathic rats
TNTPrL.ChR2:hM4Di rats
Figure 3E - Effect of chemoinhibtion on mechanical sensitivty of the ipsilateral (injured) paw in TNTPrL.ChR2:hM4Di rats																				Figure 3F - Effect of chemoinhibtion on mechanical sensitivty of the contralateral paw in TNTPrL.ChR2:hM4Di rats
	Day	Pre - CNO																			Day	Pre - CNO
	0	15	9.93	14.11	15	15	10.78	15	15	14.37	15	15	15	15	15	12.66	15				0	15	15	15	15	15	15	8.51	8.51	12.16	15	12.66	12.66	15	12.01	15	15
	3	15	9.93	12.66	3.63	15	1.66	3.08	0.98	2.04	9.72	2.24	2.41	0.53	3.64	3.08	11.06				3	15	15	5.97	15	15	13.81	15	15	6.88	15	13.89	15	15	13.81	15	15
	7	1.23	3.64	5.41	1.2	5.11	0.53	2.24	0.98	0.91	0.51	1.38	1.58	3.08	2.36	3.09	6.88				7	15	15	12.66	15	15	12.66	15	15	5.38	10.23	7.39	15	3.08	15	15	9.71
	14	0.26	4.57	0.04	1.67	0.31	0.41	0.32	0.78	0.2	1.66	0.49	3.08	1.09	0.48	1.58	0.63				14	15	4.84	1.72	15	15	15	12.66	15	12.66	9.69	4.47	12.66	15	5.97	15	15
		post-CNO																				post-CNO
	0	NA	NA	NA	NA	NA	NA	NA	NA	NA	NA	NA	NA	NA	NA	NA	NA				0	NA	NA	NA	NA	NA	NA	NA	NA	NA	NA	NA	NA	NA	NA	NA	NA
	3	7.52	2.38	0.85	0.75	1.66	0.23	1.07	0.07	0.09	1.58	0.28	0.18	0.13	0.05	0.51	2.36				3	15	5.55	6.87	15	4.69	3.38	11.25	13.62	3.28	2.72	3.59	4.67	15	15	15	15
	7	0.52	0.45	0.91	0.23	0.32	0.17	0.64	0.23	0.02	0.23	0.09	0.12	0.01	0.03	0.32	0.45				7	2.06	1.58	2.72	3.63	9.69	18.62	8.01	13.62	5.11	15	15	15	11.13	6.44	15	15
	14	1.81	0.12	0.17	0.02	0.24	0.16	0.28	0.56	0.4	0.13	0.26	0.36	0.64	0.02	0.68	0.53				14	5.54	0.21	0.53	15	15	7.5	15	15	4.47	7.08	3.64	5.11	15	15	15	15
Two-way RM ANOVA	F (DFn, DFd)	P value																		Two-way RM ANOVA	F (DFn, DFd)	P value
Time x CNO	F (2, 60) = 6.892	P=0.0020																		Time x CNO	F (2, 60) = 0.7572	P=0.4734
Time	F (1.263, 37.89) = 14.63	P=0.0002																		Time	F (1.666, 49.98) = 0.4037	P=0.6326
CNO	F (1, 30) = 20.09	P=0.0001																		CNO	F (1, 30) = 5.767	P=0.0227
Subject	F (30, 60) = 1.577	P=0.0669																		Subject	F (30, 60) = 1.968	P=0.0130
Sidak's multiple comparisons test	Mean Diff.	95.00% CI of diff.	Adjusted P Value																	Sidak's multiple comparisons test	Mean Diff.	95.00% CI of diff.	Adjusted P Value
preCNO - CNO																				preCNO - CNO
3	4.809	1.190 to 8.428	0.0076																	3	4.359	0.4551 to 8.262	0.0255
7	2.212	0.9253 to 3.498	0.001																	7	2.406	-1.990 to 6.802	0.4382
14	0.6994	-0.1473 to 1.546	0.125																	14	1.912	-2.827 to 6.651	0.6784
Figure 3I - Effect of chemoinhibtion on cold sensitivty of the ipsilateral (injured) paw in TNTPrL.ChR2:hM4Di rats																				Figure 3J - Effect of chemoinhibtion on cold sensitivty of the contralateral paw in TNTPrL.ChR2:hM4Di rats
	Day	Pre - CNO																			Day	Pre - CNO
	0	0	0	0	0	0	0	0	0	0	0	0	0	0	0	0	0				0	0	0	0	0	0	0	0	0	0	0	0	0	0	0	0	0
	3	0	0.7	5.3	0	4	1.3	6	0.33	3.7	4.7	3.6	3	5	1.5	2	3.3				3	0	0	1.3	0	0.7	0	0.7	0	0.7	1	1.6	1	1.7	1	1	1
	7	6.7	3.3	7	13.9	7.3	1.7	9.7	2	11.3	7	4.7	8.3	2.3	5	4	6.3				7	1	0.7	0.7	1.3	0.3	0.33	0.3	1.5	1	2.7	2.3	2.3	4.7	0.7	2	1
	14	4.7	11.7	5.3	4.6	5.7	1.7	9.7	5.3	18	5	10	11.7	9.7	3.7	3.3	11.7				14	0	0.7	0.7	0	2	0	0.33	1.3	1	4	1.3	2	3	1.3	2.3	1.3
		post-CNO																				post-CNO
	0	NA	NA	NA	NA	NA	NA	NA	NA	NA	NA	NA	NA	NA	NA	NA	NA				0	NA	NA	NA	NA	NA	NA	NA	NA	NA	NA	NA	NA	NA	NA	NA	NA
	3	2.7	5	7.6	8	4	5.3	9	0.3	7.7	10	6	7	8.3	2.5	5.5	4.7				3	0	1.3	0	1	0.7	0.3	1	0.7	1.3	3	1.3	3.5	3.4	4	2.7	1
	7	5.7	9.3	10.7	8	8	6.33	11.3	7	16	8.3	10	15.7	6.7	8.6	2.3	12				7	0	1	0.7	0.3	2.3	1	3.7	1.3	1	2.3	1	3	2.3	0.3	3.3	2
	14	7.6	18	8.7	14	3.7	4.7	7.3	9.7	13.7	7	16.7	10.7	12.7	9.7	3	11				14	1.3	0.7	0	1.5	0.7	0.7	1	1.7	1	1.3	1.5	3.7	2	1.3	1.3	1.3
Two-way RM ANOVA	F (DFn, DFd)	P value																		Two-way RM ANOVA	F (DFn, DFd)	P value
Time x CNO	F (2, 60) = 0.1515	P=0.8598																		Time x CNO	F (2, 60) = 2.847	P=0.0659
Time	F (1.888, 56.64) = 19.35	P<0.0001																		Time	F (1.890, 56.71) = 1.778	P=0.1799
CNO	F (1, 30) = 9.609	P=0.0042																		CNO	F (1, 30) = 1.245	P=0.2734
Subject	F (30, 60) = 2.092	P=0.0076																		Subject	F (30, 60) = 3.698	P<0.0001
Sidak's multiple comparisons test	Mean Diff.	95.00% CI of diff.	Adjusted P Value																	Sidak's multiple comparisons test	Mean Diff.	95.00% CI of diff.	Adjusted P Value
preCNO - CNO																				preCNO - CNO
3	-3.073	-5.162 to -0.9845	0.0026																	3	-0.9021	-1.771 to 0.08352	0.0817
7	-2.839	-5.942 to 0.2637	0.0809																	7	-0.1865	-1.189 to 0.8557	0.9681
14	-2.275	-6.164 to 1.614	0.385																	14	0.04021	-0.8613 to 0.8900	>0.9999
Figure 3G - Effect of chemoinhibtion on mechanical sensitivty of the ipsilateral (injured) paw in TNTPrL.Control rats																				Figure 3H - Effect of chemoinhibtion on mechanical sensitivty of the contralateral paw in TNTPrL.Control rats
	Day	Pre - CNO																			Day	Pre - CNO
	0	15	12.92	15	15	15	15	8.51	15												0	15	15	15	15	15	15	15	15
	3	12.66	4.15	15	5.11	5.11	15	12.66	15												3	15	15	15	12.66	15	15	8.34	12.66
	7	2.29	2.95	15	0.37	0.98	14.11	15	3.65												7	15	15	15	2.07	15	15	6.11	15
	14	2.96	5.74	0.91	0.07	0.01	3.95	9.69	3.2												14	15	15	15	4.08	15	15	15	11.85
		post-CNO																				post-CNO
	0	NA	NA	NA	NA	NA	NA	NA	NA												0	NA	NA	NA	NA	NA	NA	NA	NA
	3	14.84	4.42	2.72	0.49	1.35	15	15	8.34												3	8.98	15	15	11.04	15	15	10.47	11.25
	7	2.29	6.43	15	0.05	0.98	5.97	12.01	15												7	15	15	15	3.08	15	12.73	15	15
	14	1.1	2.72	2.21	0.07	3.89	15	5.97	8.25												14	15	15	15	12.66	15	15	15	15
Two-way RM ANOVA	F (DFn, DFd)	P value																		Two-way RM ANOVA	F (DFn, DFd)	P value
Time x CNO	F (2, 28) = 1.112	P=0.3431																		Time x CNO	F (2, 28) = 0.8840	P=0.4243
Time	F (1.898, 26.57) = 5.529	P=0.0108																		Time	F (1.840, 25.76) = 0.9191	P=0.4042
CNO	F (1, 14) = 0.01653	P=0.8995																		CNO	F (1, 14) = 0.1447	P=0.7093
Subject	F (14, 28) = 2.819	P=0.0095																		Subject	F (14, 28) = 3.280	P=0.0036
Sidak's multiple comparisons test	Mean Diff.	95.00% CI of diff.	Adjusted P Value																	Sidak's multiple comparisons test	Mean Diff.	95.00% CI of diff.	Adjusted P Value
preCNO - CNO																				preCNO - CNO
3	2.816	-4.968 to 10.60	0.7133																	3	0.865	-2.456 to 4.186	0.8688
7	-0.4225	-9.066 to 8.221	0.9989																	7	-0.9537	-7.352 to 5.445	0.9705
14	-1.585	-7.296 to 4.126	0.8407																	14	-1.466	-5.712 to 2.780	0.6936
Figure 3K - Effect of chemoinhibtion on cold sensitivty of the ipsilateral (injured) paw in TNTPrL.Control rats																				Figure 3I - Effect of chemoinhibtion on cold sensitivty of the contralateral paw in TNTPrL.Control rats
	Day	Pre - CNO																			Day	Pre - CNO
	0	0.7	1	0	0	0	0	0													0	0	0	0	0	0	0	0
	3	4	2	2	1.4	0	0	3.7													3	0.3	0.33	0	0.33	0	0	0.7
	7	6	9.3	1.7	9	9	0.7	1.7													7	0	0.33	0.67	0	0	1.3	0.7
	14	8.3	0	3	9.3	11.3	5.7	2													14	1	0	0	0	0.3	0	0
		post-CNO																				post-CNO
	0	NA	NA	NA	NA	NA	NA	NA													0	NA	NA	NA	NA	NA	NA	NA
	3	2.3	2	5.7	5	0	0	0													3	1.33	1	1.67	2	0	0	0
	7	6.7	5	1.7	16.3	7.3	1	0.7													7	0	0.33	0.67	2.67	0	0.7	0
	14	4.3	0	3	23.7	8.7	0.3	2.3													14	1.67	0	0	1	0.67	0	0
Two-way RM ANOVA	F (DFn, DFd)	P value																		Two-way RM ANOVA	F (DFn, DFd)	P value
Time x CNO	F (2, 24) = 0.002630	P=0.9974																		Time x CNO	F (2, 24) = 0.5723	P=0.5718
Time	F (2, 24) = 4.649	P=0.0197																		Time	F (1.697, 20.36) = 0.6547	P=0.5060
CNO	F (1, 12) = 0.01921	P=0.8921																		CNO	F (1, 12) = 2.160	P=0.1673
Subject	F (12, 24) = 3.219	P=0.0071																		Subject	F (12, 24) = 2.185	P=0.0498
Sidak's multiple comparisons test	Mean diff	95.00% CI of diff.	Adjusted P Value																	Sidak's multiple comparisons test	Mean Diff.	95.00% CI of diff.	Adjusted P Value
preCNO - CNO																				preCNO - CNO
3	-0.2714	-6.733 to 6.191	0.9994																	3	-0.62	-1.671 to 0.4314	0.2935
7	-0.1857	-6.648 to 6.276	0.9998																	7	-0.1957	-1.381 to 0.9894	0.9536
14	-0.3857	-6.848 to 6.076	0.9984																	14	-0.2914	-1.125 to 0.5420	0.7089
