# Supplementary material for: Loss of cortical control over the descending pain modulatory system determines the development of the neuropathic pain state in rats
Source: eLife. 2021 Feb 8;10:e65156. doi: 10.7554/eLife.65156 (PMC7895525; doi:10.7554/eLife.65156)
Supplement: Figure 4—source data 1. [file elife-65156-fig4-data1.xlsx]

## Sheet: Sheet1
Figure 4. Inhibition of PrL-P neurons produces aversion in neuropathic animals.
Figure 4C - Effect of chemoinhibition on place aversion in TNTPrL.ChR2:hM4Di rats.									Figure 4D - Effect of chemoinhibition on place aversion in TNTControl rats.
	CNO paired	Vehicle paired								CNO paired	Vehicle paired
	0.75	1.17								2.09	0.48
	0.67	1.4								0.99	0.66
	0.93	0.95								0.76	1.04
	0.93	0.91								0.89	0.96
	0.75	0.94								1.34	0.86
	1.02	1.07								1.21	0.6
	0.86	0.98								0.55	1.76
	0.86	1.07								0.42	2.33
mean	0.85	1.1								1.65	0.38
SEM	0.04	0.06							mean	1.1	1
									SEM	0.1783	0.2141
Paired t test	t(7)=2.433	p=0.0452	n=8
									Paired t test	t(8)=0.2470	p=0.8111	n=9
