# Supplementary material for: Loss of cortical control over the descending pain modulatory system determines the development of the neuropathic pain state in rats
Source: eLife. 2021 Feb 8;10:e65156. doi: 10.7554/eLife.65156 (PMC7895525; doi:10.7554/eLife.65156)
Supplement: Figure 5—source data 1. [file elife-65156-fig5-data1.xlsx]

## Sheet: Sheet1
Figure 5 - Activation of PrL-P neurons produces antinociception in neuropathic rats by inhibition at a spinal level
Figure 5B - Effect of optactivation on mechanical withdrawal thresholds of the ipsilateral hindpaw in late stage TNTPrL.ChR2:hM4Di rats
	Baseline	Optoactivation	Post-stimulation
	0.42	3.64	0.62
	0.02	2.72	0.5
	0.23	1.1	0.28
	0.98	3.64	2.91
	5.11	12.66	2.81
	2.35	0.91	3.64
	1.02	5.61	1.66
	2.63	11.25	3.64
	2.24	5.61	3.31
mean	1.667	5.238	2.152
SEM	0.5375	1.388	0.4655
RM One-way ANOVA	F (DFn, DFd)	P value
Treatment (between columns)	F (1.120, 8.956) = 8.072	P=0.0176
Individual (between rows)	F (8, 16) = 3.236	P=0.0218
Dunnett's multiple comparisons test	Mean Diff.	95.00% CI of diff.	Adjusted P Value
Baseline vs Optoactivation	-3.571	-6.327 to -0.8154	0.0154
Baseline vs post-stimulation	-0.4856	-1.549 to 0.5783	0.4081
Figure 5D - Effect of optpoactivation on spinal wide dynamic range neuron activity evoked by 4g Von Frey hair
	Baseline	Optoactivation	Post-stimulation
	56	33.7	41.7
	15.6	10.3	13
	17.7	9.7	23
	29	24.3	24
	5	4	4.3
	16	7.7	32
	38	11
	31	15
	23	16	37
mean	25.7	14.63	25
SEM	5.006	3.065	4.999
Mixed-effects model (REML)	F (DFn, DFd)	P value
Fixed effect (type III)
Treatment (between columns)	F (1.997, 13.98) = 7.184	0.0072
Dunnett's multiple comparisons test	Mean Diff.	95.00% CI of diff.	Adjusted P Value
Baseline vs. Optoactivation	11.07	3.248 to 18.88	0.0097
Baseline vs. Recovery	0.7	-10.64 to 12.04	0.9778
Figure 5D - Effect of optpoactivation on spinal wide dynamic range neuron activity evoked by 15g Von Frey hair
	Baseline	Optoactivation	Post-stimulation
	90	79	67
	46	23	17.3
	25	15.7	36
	33	23.7	44.7
	22	13.7	18.7
	51.7	20.7	64.3
	65	59
	40	54
	57	27	59
mean	47.74	35.09	43.86
SEM	7.115	7.673	7.843
Mixed-effects model (REML)	F (DFn, DFd)	P value
Fixed effect (type III)
Treatment (between columns)	F (1.520, 10.64) = 2.947	0.1047
Dunnett's multiple comparisons test	Mean Diff.	95.00% CI of diff.	Adjusted P Value
Baseline vs. Optoactivation	12.66	0.2512 to 25.06	0.0461
Baseline vs. Recovery	3.887	-13.59 to 21.37	0.762
Figure 5D - Effect of optpoactivation on spinal wide dynamic range neuron activity evoked by acetone
	Baseline	Optoactivation
	132.7	15
	127	30
	289	193
	143	129
mean	172.9	91.75
SEM	38.83	42.17
Paired t-test	t(3)=3.538	p=0.0384	n=4
